# Supplementary material for: Development and Validation of an Immune Microenvironment Based Prognostic Signature and Signal Pathways in Prostate Cancer
Source: Research Square preprint supplement (doi:10.21203/rs.3.rs-101879/v1), 2020-11-11
Supplement: Supplementary file 1 [file c06ecf730115453ba20915a2.xlsx]

## Sheet: Sheet1
NAME	ES	NES	NOM p-val	FDR q-val
GO_POSITIVE_REGULATION_OF_INFLAMMATORY_RESPONSE	-0.728239	-2.52202	0	0
GO_MYELOID_LEUKOCYTE_MIGRATION	-0.750411	-2.48318	0	0
GO_CYTOKINE_SECRETION	-0.706719	-2.45769	0	0
GO_TUMOR_NECROSIS_FACTOR_SUPERFAMILY_CYTOKINE_PRODUCTION	-0.723558	-2.45478	0	0
GO_HYDROLASE_ACTIVITY_ACTING_ON_ACID_PHOSPHORUS_NITROGEN_BONDS	-0.585488	-2.42899	0	0
GO_REGULATION_OF_LEUKOCYTE_MIGRATION	-0.718311	-2.42474	0	0
GO_POSITIVE_REGULATION_OF_LEUKOCYTE_MIGRATION	-0.738999	-2.41763	0	0
GO_MACROPHAGE_MIGRATION	-0.790748	-2.41466	0	0
Analysis of the main biological functions of LTF genes based on GO.
