# Supplementary material for: Development and Validation of an Immune Microenvironment Based Prognostic Signature and Signal Pathways in Prostate Cancer
Source: Research Square preprint supplement (doi:10.21203/rs.3.rs-101879/v1), 2020-11-11
Supplement: Supplementary file 2 [file da965e2a148cdc7636266f8c.xlsx]

## Sheet: Sheet1
NAME	ES	NES	NOM p-val	FDR q-val
KEGG_AMINOACYL_TRNA_BIOSYNTHESIS	0.738739	2.39648	0	0
KEGG_MISMATCH_REPAIR	0.711015	2.33849	0	0
KEGG_BASAL_TRANSCRIPTION_FACTORS	0.577272	2.0174	0	0.000687574
KEGG_UBIQUITIN_MEDIATED_PROTEOLYSIS	0.406636	1.90584	0	0.000111996
KEGG_NUCLEOTIDE_EXCISION_REPAIR	0.44665	1.71264	0.00816326	0.0104582
KEGG_BASE_EXCISION_REPAIR	0.405107	1.45865	0.0307692	0.0558451
Based on KEGG to analyze the biological pathways of LTF enrichment in normal tissues.
